# Supplementary material for: A mixed-ligand Co metal–organic framework and its carbon composites as excellent electrocatalysts for the oxygen evolution reaction in green-energy devices
Source: Royal Society of Chemistry journal article supplement (doi:10.1039/d3dt02421k), 2023-11-23
Supplement: d3dt02421k1.pdf [file d3dt02421k1.pdf]

Supplementary Information for:

**Mixed-ligand Co metal-organic framework and its carbon composites as excellent electrocatalysts for oxygen evolution reaction in green-energy devices**

Gajendra Gupta,<sup>\*a</sup> Filipe Gusmão,<sup>c</sup> Anup Paul,<sup>\*b</sup> Biljana Šljukić,<sup>c</sup> Diogo M. F. Santos,<sup>c</sup>  
Junseong Lee,<sup>d</sup> M. Fátima C. Guedes da Silva,<sup>b,e</sup> Armando J. L. Pombeiro<sup>b</sup> and  
Chang Yeon Lee<sup>\*a</sup>

<sup>a</sup>Department of Energy and Chemical Engineering/Innovation Center for Chemical Engineering, Incheon National University, 119 Academy-ro, Yeonsu-gu, Incheon 22012, Republic of Korea.

<sup>b</sup>Centro de Química Estrutural, Institute of Molecular Sciences, Instituto Superior Técnico, Universidade de Lisboa, Av. Rovisco Pais, 1049-001, Lisbon, Portugal.

<sup>c</sup>Center of Physics and Engineering of Advanced Materials, Laboratory of Physics of Materials and Emerging Technologies, Chemical Engineering Department, Instituto Superior Técnico, Universidade de Lisboa, 1049-001, Lisbon, Portugal.

<sup>d</sup>Department of Chemistry, Chonnam National University, Gwangju, 61186, Republic of Korea.

<sup>e</sup>Departamento de Engenharia Química, Instituto Superior Técnico, Universidade de Lisboa, Av. Rovisco Pais, 1049-001, Lisbon, Portugal.

**Correspondence:** G. Gupta ([gjngupt@gmail.com](mailto:gjngupt@gmail.com))

A. Paul ([anuppaul@tecnico.ulisboa.pt](mailto:anuppaul@tecnico.ulisboa.pt))

C. Y. Lee ([cylee@inu.ac.kr](mailto:cylee@inu.ac.kr))

## Experimental Section

The dipyrrolyl functionalised BODIPY ligand was synthesized according to the method we reported previously.[1] All other reagents and solvents were commercially available and used without further purification. The  $^1\text{H}$ -NMR spectra were recorded on an Agilent 400-MR spectrometer using the residual protonated solvent as an internal standard. Thermal properties were studied using a Perkin-Elmer Instrument system (STA6000) at a heating rate of  $10\text{ }^\circ\text{C}/\text{min}$  under a dinitrogen atmosphere and a flow rate of  $20\text{ mL}/\text{min}$ . Powder XRD was recorded on Rigaku SmartLab X-ray diffractometer. Gas sorption isotherms were measured at  $77\text{ K}$  using a Micromeritics ASAP 2020 surface area analyzer with prior degassing at  $80\text{ }^\circ\text{C}$  for  $12\text{ h}$ .

### Electrochemical measurements:

The activity of the prepared CoBDPMOF/Carbon materials for OER electrocatalysis was assessed using a three-electrode system with a saturated calomel electrode (SCE) as the reference electrode, a platinum coil as the counter electrode, and the CoBDPMOF/Carbon as the working electrode. A graphite reference electrode was used during stability experiments. All electrochemical measurements were performed at room temperature ( $25\text{ }^\circ\text{C}$ ) using an ALS/DY2325 Bi-Potentiostat from ALS-Japan. All potentials have been converted (and presented) to the reference hydrogen electrode (RHE) scale using the equation  $E(\text{RHE}) = E(\text{SCE}) + 0.242 + 0.059\text{pH}$ . Electrodes were placed in  $1\text{ M KOH}$  ( $80\text{ mL}$ , Sigma-Aldrich, Taufkirchen, Germany) as supporting electrolyte.

Electrochemical characterization and investigation of the catalytic activity of the samples were performed using standard electrochemical methods: cyclic voltammetry (CV), linear sweep voltammetry (LSV), electrochemical impedance spectroscopy (EIS), and chronoamperometry. The capacitance measurements were done in a deaerated solution achieved by bubbling nitrogen (Air Liquide, 99.998 vol.%) into the electrolyte solution for  $20\text{ min}$  before the experiments and keeping a gentle flow of  $\text{N}_2$  just above the electrolyte while running the measurements. Electrochemical impedance spectroscopy (EIS) was carried out in the frequency range from  $100\text{ kHz}$  to  $0.1\text{ Hz}$  at  $1.67\text{ V}$  vs RHE. For OER studies, 5 LSVs were run in OER polarization conditions at a scan rate of  $10\text{ mV s}^{-1}$ . The stability test was run in chronoamperometric mode at a constant potential of  $1.7\text{ V}$  for  $24\text{ h}$ .

## X-Ray Structure Determination

A crystal of **CoBDPMOF** was mounted on a loop and reflection data was collected using a Bruker APEX-II CCD-based diffractometer with graphite-monochromated Mo K $\alpha$  radiation ( $\lambda = 0.7107$  Å). The hemisphere of the reflection data was collected as  $\varphi$  and  $\omega$  scan frames at 0.5  $^\circ$ /frame and an exposure time of 10 s/frame. The cell parameters were determined and refined by the SMART APEX2 program.[2] Data reduction was performed using the SAINT software. The data were corrected for Lorentz and polarization effects. Empirical absorption correction was applied using the SADABS program.[3] The structures of the compounds were obtained by direct methods and refined by full-matrix least-squares methods using the SHELXTL program package [4] and Olex 2 program [5] with anisotropic thermal parameters for all non-hydrogen atoms. In view of instability in refinement, several restraints were included. All hydrogen atoms bonded to carbon were included in the model at geometrically calculated positions and refined using a riding model. The hydrogen atoms of the crystallization water molecule were located in the difference Fourier synthesis and refined with the help of distance restraints; hydrogen atoms for the remaining water molecule (O27) could not be located. Crystallographic details are summarized in Table S1. Figures of molecular structures were drawn with MERCURY program. **CCDC No. 2250942** contains the supplementary crystallographic data for this paper. These data can be obtained free of charge at [www.ccdc.cam.ac.uk/conts/retrieving.html](http://www.ccdc.cam.ac.uk/conts/retrieving.html) [or from the Cambridge Crystallographic Data Centre, 12, Union Road, Cambridge CB2 1EZ, UK; fax: (internat.) +44-1223/336-033; Email: [deposit@ccdc.cam.ac.uk](mailto:deposit@ccdc.cam.ac.uk)].

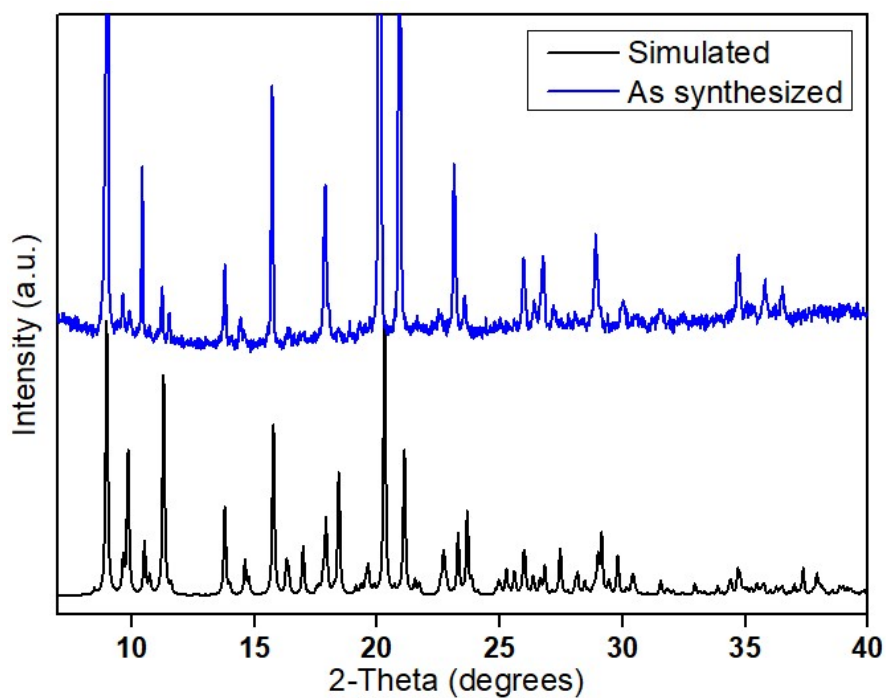

**Figure S1:** Powder XRD pattern of simulated and as synthesized **CoBDPMOF**.

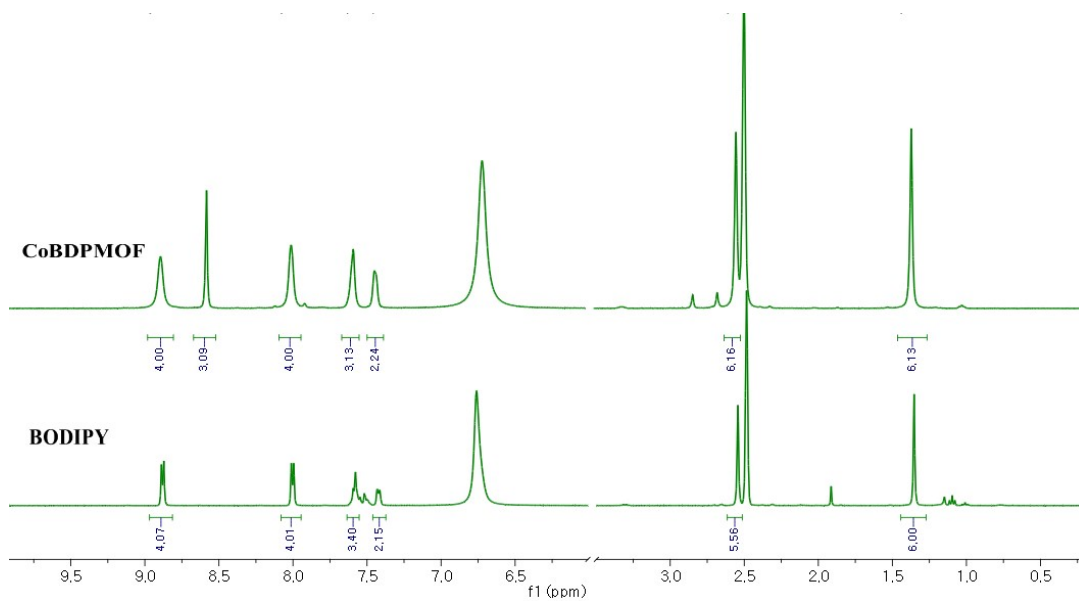

**Figure S2:**  $^1\text{H}$  NMR spectra of the digested **CoBDPMOF** and of the functionalized BODIPY moiety in DCl/DMSO- $d_6$  (1:9) solution; resonances pertaining to each ligand types are clear.

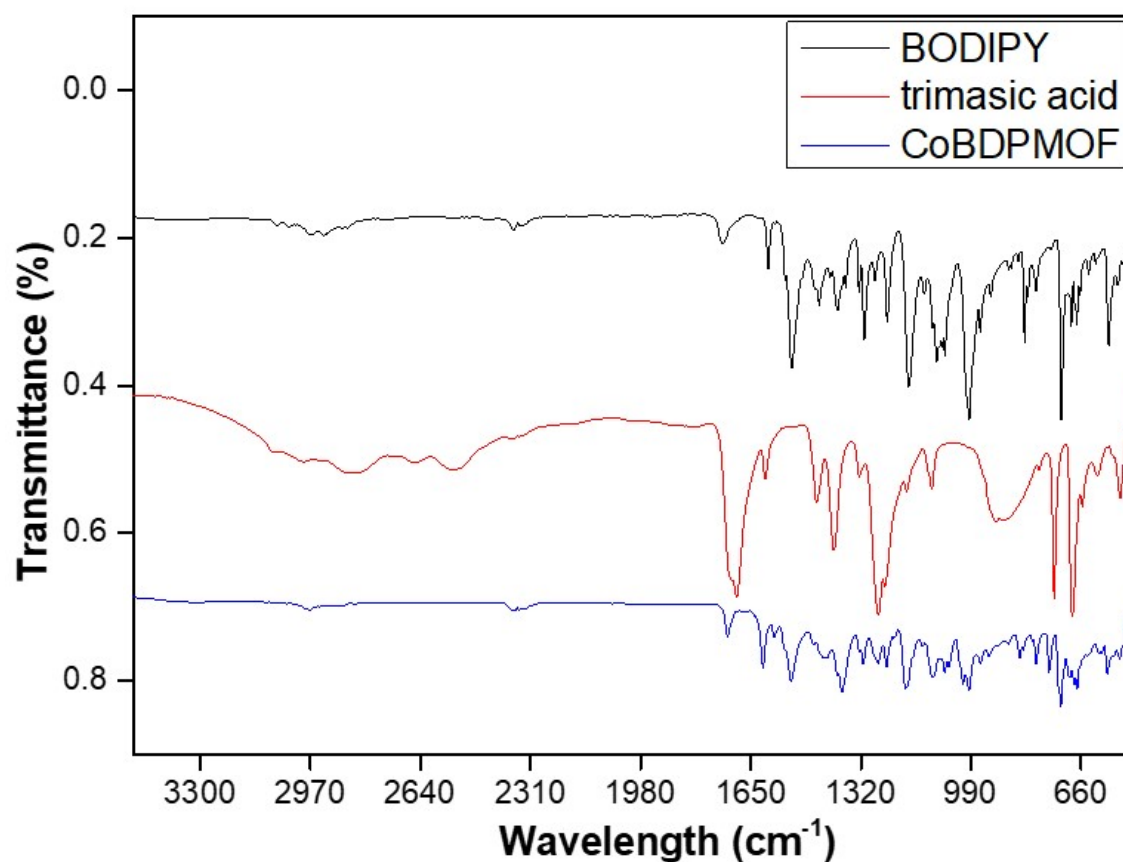

**Figure S3:** Infrared spectra of the free BODIPY ligand, trimasic acid and **CoBDPMOF**.

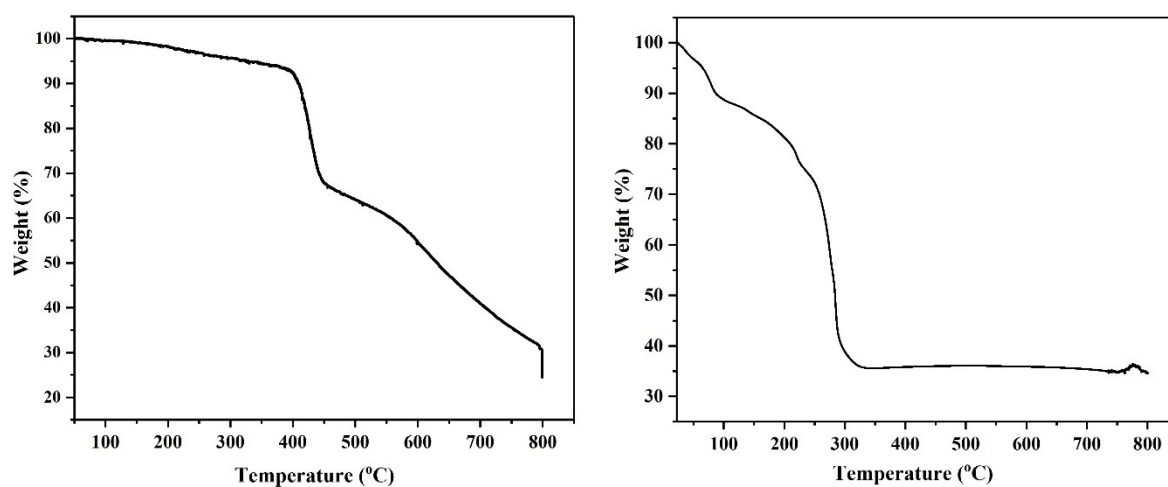

**Figure S4:** TGA analysis of **CoBDPMOF** (left) and **CoBTC** (right).

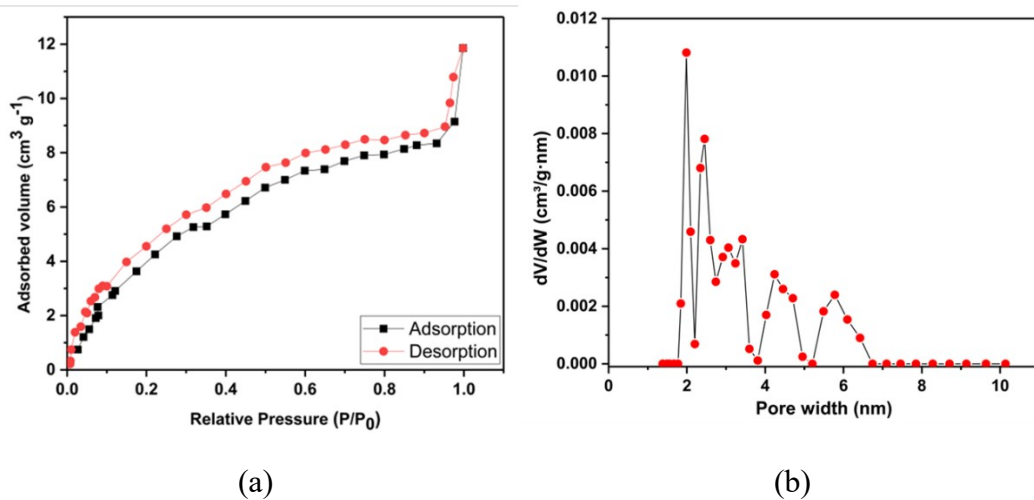

**Figure S5.** N<sub>2</sub> adsorption isotherms at 77 K for the **CoBDPMOF** (a) and its NLDFT PSD (b).

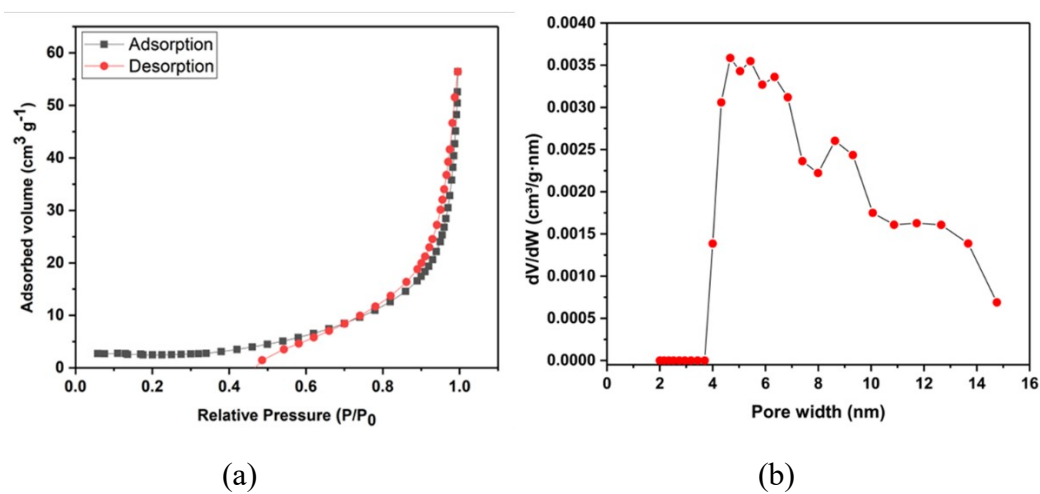

**Figure S6.** N<sub>2</sub> adsorption isotherms at 77 K for the **CoBTC** (a) and its NLDFT PSD (b).

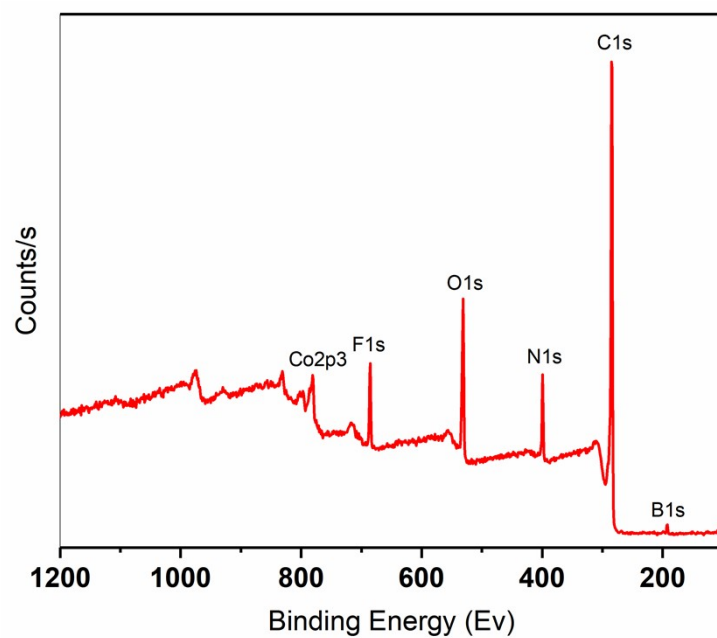

**Figure S7:** XPS survey spectrum of CoBDPMOF.

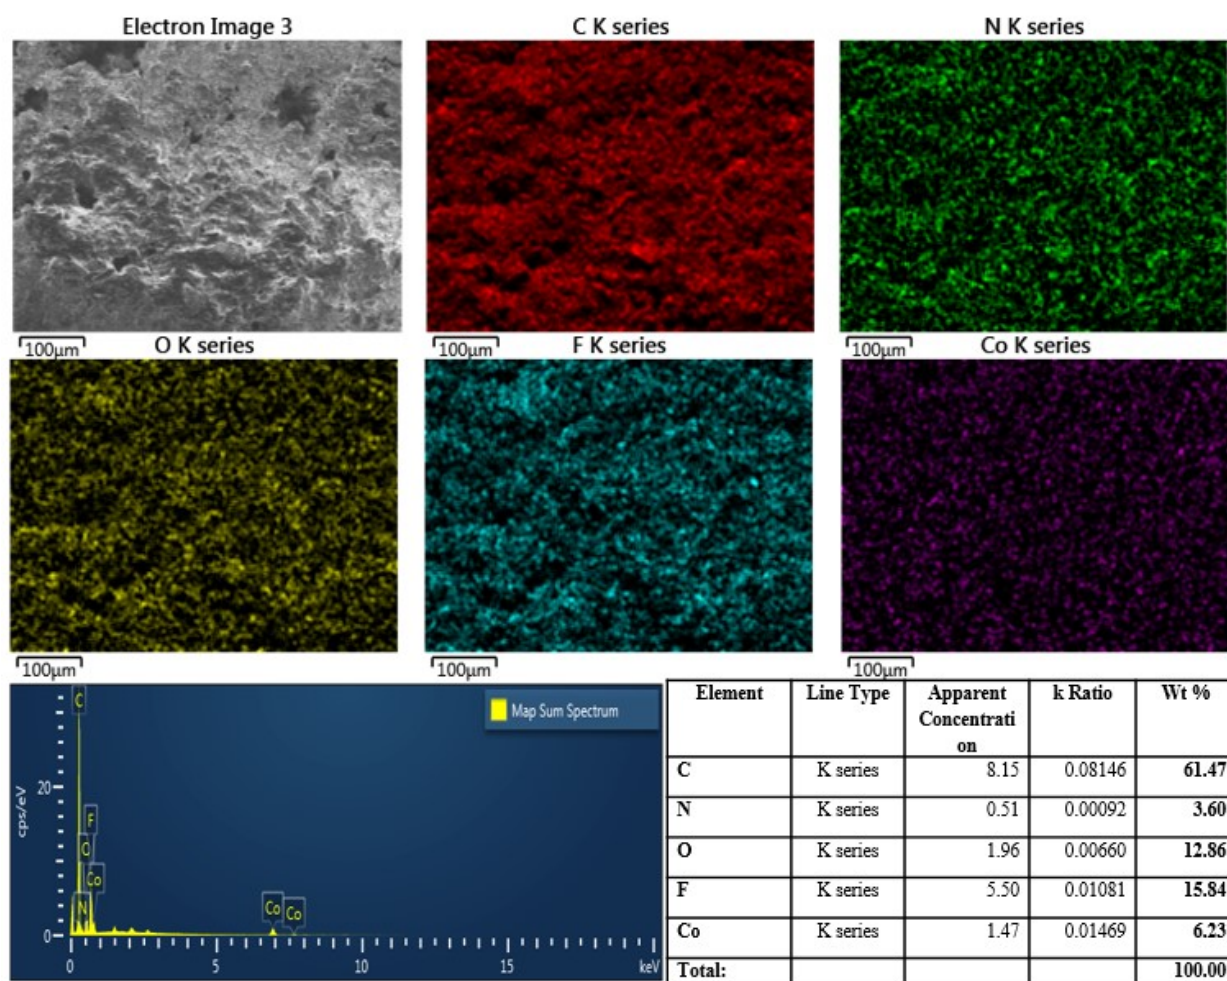

(a)

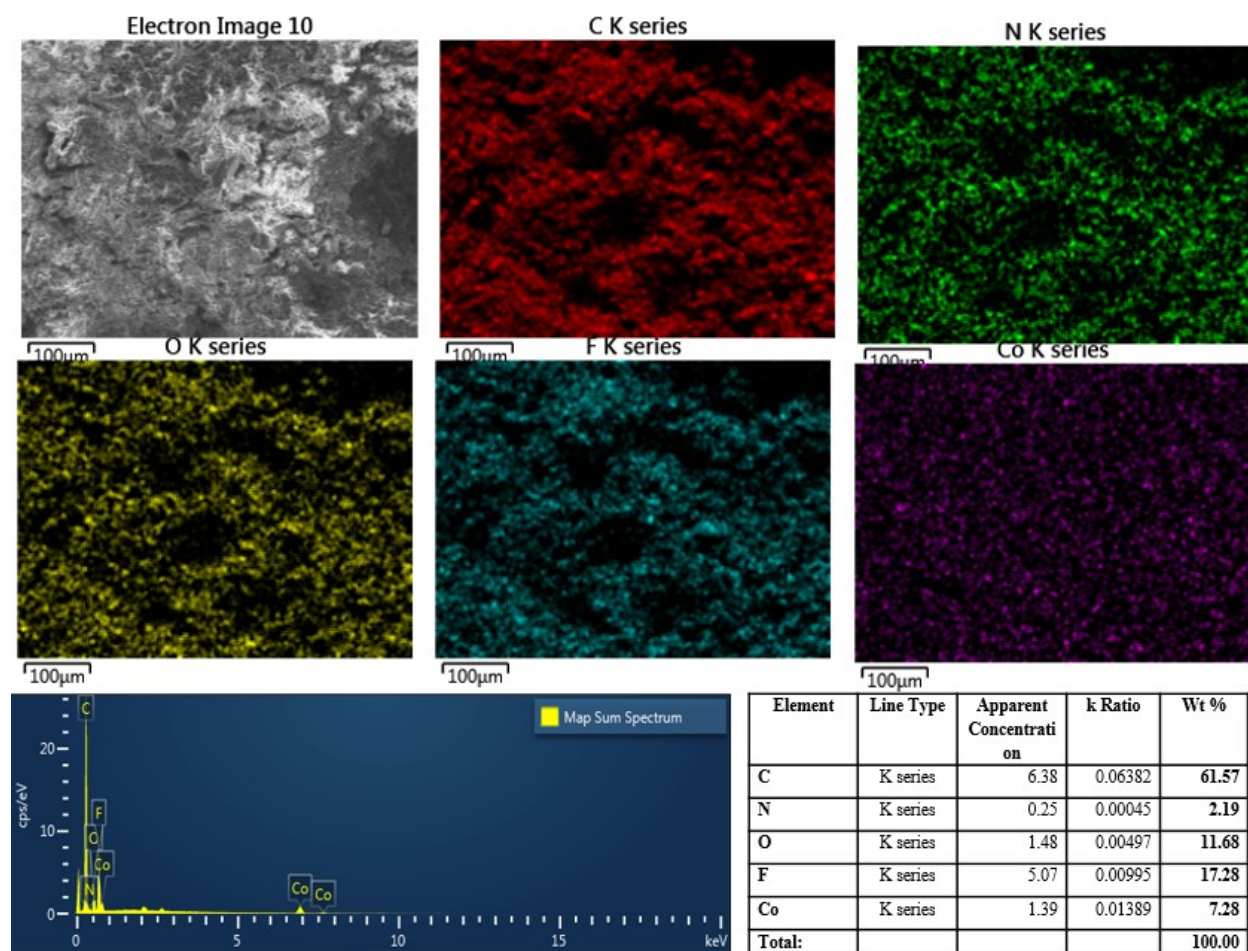

(b)

**Figure S8:** Elemental mapping and EDX analysis of CoBDPMOF (a) and CoBDPMOF@AC (b).



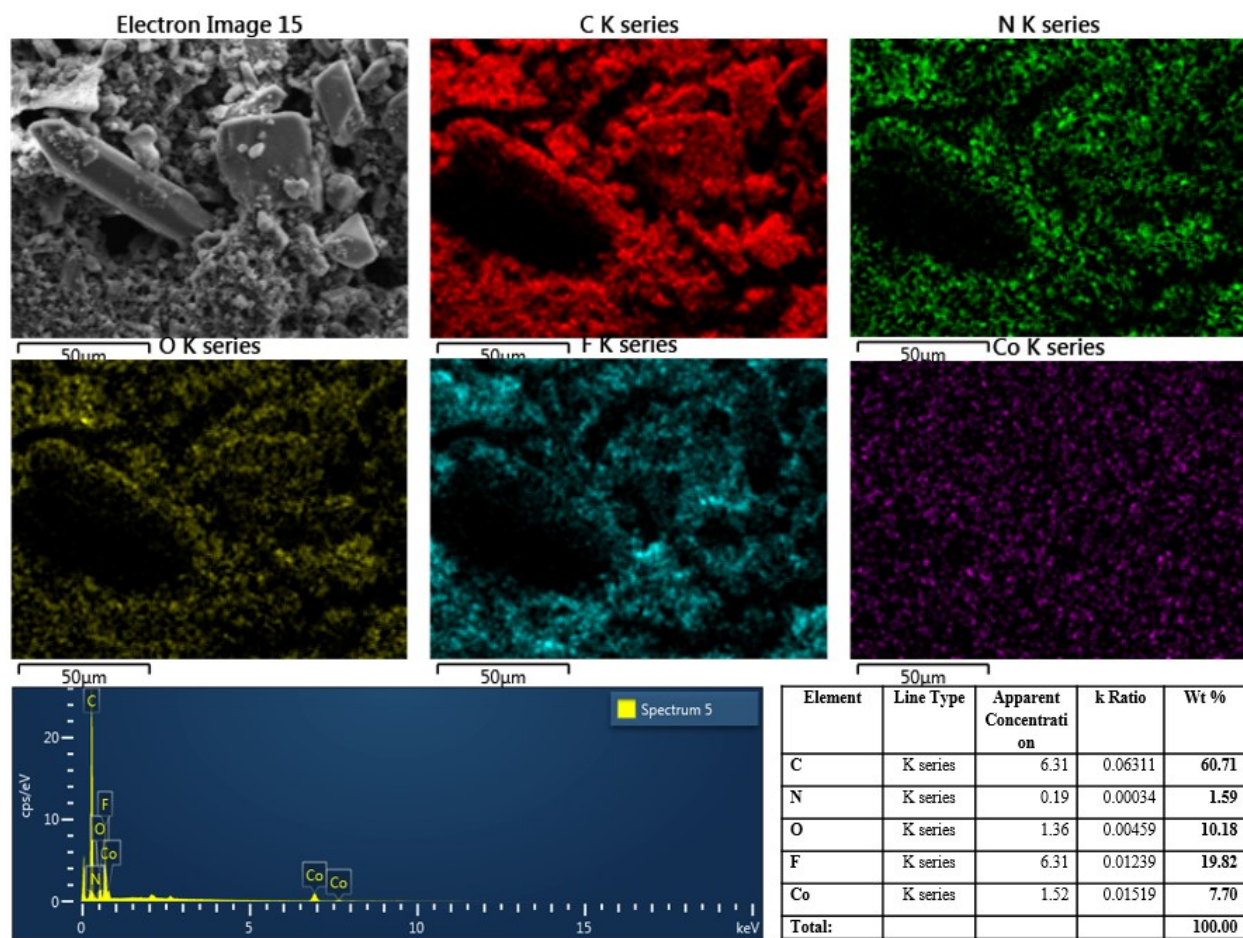

(b)

**Figure S9:** Elemental mapping and EDX analysis of CoBDPMOF@CNT (a) and CoBDPMOF@rGO (b).

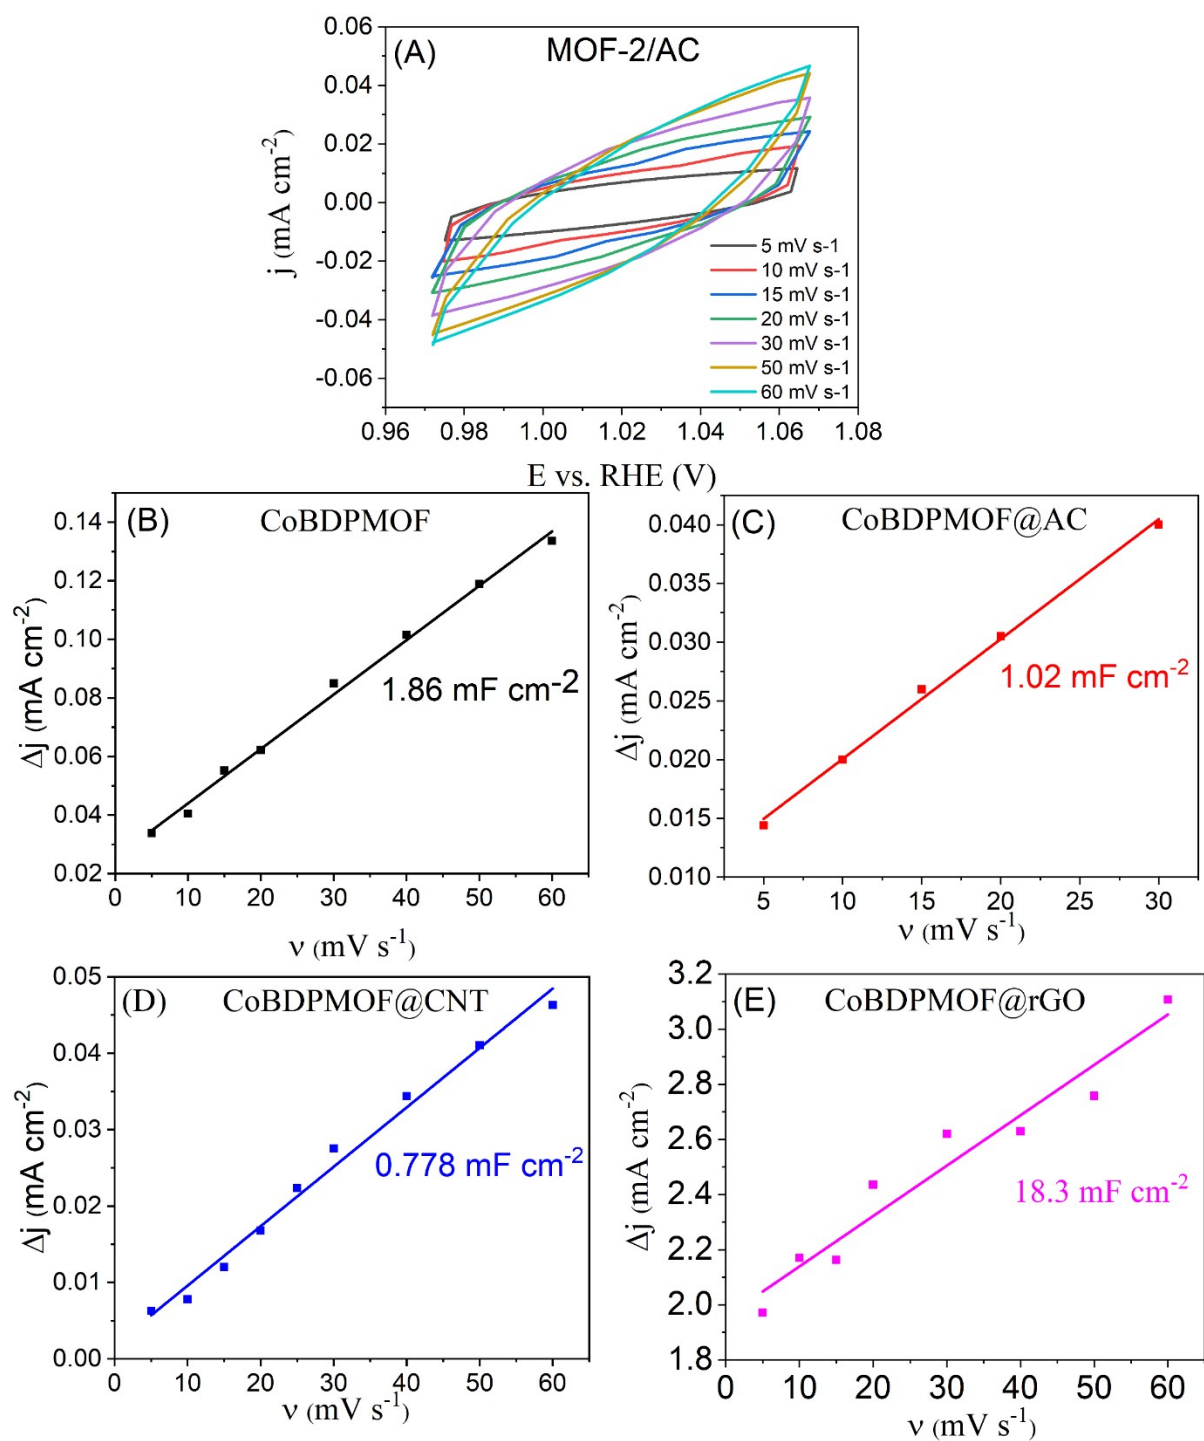

**Figure S10:** Capacitance plots of CoBDPMOF@AC (A) and the difference between cathodic and anodic current density vs. scan rate for the studied materials (B-E).

**Table S1.** Crystal data and structure refinement for **CoBDPMOF**.

|                                             | <b>CoBDPMOF</b>                                                                                             |
|---------------------------------------------|-------------------------------------------------------------------------------------------------------------|
| CCDC #                                      | 2250942                                                                                                     |
| Empirical formula                           | C <sub>38</sub> H <sub>31</sub> B <sub>1</sub> Co <sub>1</sub> F <sub>2</sub> N <sub>4</sub> O <sub>7</sub> |
| Formula weight                              | 763.41                                                                                                      |
| Temperature/K                               | 100                                                                                                         |
| Crystal system                              | triclinic                                                                                                   |
| Space group                                 | P $\bar{1}$ (2)                                                                                             |
| a/Å                                         | 10.3351(4)                                                                                                  |
| b/Å                                         | 10.7704(4)                                                                                                  |
| c/Å                                         | 15.9693(5)                                                                                                  |
| $\alpha$ /°                                 | 91.472(2)                                                                                                   |
| $\beta$ /°                                  | 100.354(2)                                                                                                  |
| $\gamma$ /°                                 | 103.714(2)                                                                                                  |
| Volume/Å <sup>3</sup>                       | 1694.45(11)                                                                                                 |
| Z                                           | 2                                                                                                           |
| $\rho_{\text{calc}}$ /cm <sup>3</sup>       | 1.496                                                                                                       |
| $\mu$ /mm <sup>-1</sup>                     | 0.576                                                                                                       |
| F(000)                                      | 786                                                                                                         |
| Reflections collected                       | 16829                                                                                                       |
| Independent reflections                     | 3916                                                                                                        |
| R <sub>int</sub>                            | 0.815                                                                                                       |
| Reflections with I > 2 $\sigma$ (I)         | 6076                                                                                                        |
| Restraints/Parameters                       | 0/486                                                                                                       |
| Goodness-of-fit on F <sup>2</sup>           | 1.011                                                                                                       |
| Final R indexes [I ≥ 2 $\sigma$ (I)]        | 0.0628                                                                                                      |
| Final R indexes [all data]                  | 0.1227                                                                                                      |
| Largest diff. peak/hole / e Å <sup>-3</sup> | 0.898/−0.670                                                                                                |

$$^a R_1 = \sum ||F_o| - |F_c|| / \sum |F_o|. \quad ^b wR_2 = \{ [\sum w(F_o^2 - F_c^2)^2] / [\sum w(F_o^2)^2] \}^{1/2}.$$

## References:

- [1] G. Gupta, A. Das, K. C. Park, A. Tron, H. Kim, J. Mun, N. Mandal, K.-W. Chi and C. Y. Lee, *Inorg. Chem.*, 2017, **56**, 4615-4621.
- [2] Bruker-AXS (2014). APEX2. Version 2014.11-0. Madison, Wisconsin, USA.
- [3] L. Krause, R. Herbst-Irmer, G. M. Seldrick and D. Stalke, *J. Appl. Crystallogr.*, 2015, **48**, 3-10.
- [4] G. Sheldrick, *Acta Cryst. C*, 2015, **71**, 3-8.
- [5] O. V. Dolomanov, L. J. Bourhis, R. J. Gildea, J. A. K. Howard, H. Puschmann, *J. Appl. Crystallogr.*, 2009, **42**, 339-341.
